# Supplementary material
Source: HighWire-hosted journal article supplement (https://thorax.bmj.com/content/thoraxjnl-2015-208208)
Supplement: inline-supplementary-material-1 [file inline-supplementary-material-1.pdf]

**Supplementary Table S1.** Estimated odds ratios (OR) and 95% confidence intervals (CI) for the association between growth parameters and wheezing in children with at least five weight measurements between birth and 18 months of age.

| Growth parameters <sup>§</sup> | Wheezing |           |                                     |           |
|--------------------------------|----------|-----------|-------------------------------------|-----------|
|                                | OR       | 95% CI    | OR <sub>adjusted</sub> <sup>*</sup> | 95% CI    |
| <i>Size</i>                    | 1.28     | 1.10-1.49 | 1.25                                | 1.06-1.48 |
| <i>Tempo</i>                   | 1.05     | 0.91-1.20 | 1.10                                | 0.93-1.30 |
| <i>Velocity</i>                | 1.35     | 1.17-1.55 | 1.33                                | 1.14-1.55 |

<sup>§</sup> Growth parameters are standardized (the effects are expressed as an increase in one SD) and adjusted for sex, with three internal knots for the spline curve

<sup>\*</sup> Adjusted for child's sex, gestational age, lower respiratory tract infections (bronchitis, bronchiolitis and pneumonia), siblings, maternal asthma, maternal pre-pregnancy BMI, maternal smoking during pregnancy and after delivery, maternal nationality, age and education at delivery.
