# Supplementary material
Source: HighWire-hosted journal article supplement (https://thorax.bmj.com/content/thoraxjnl-2015-208208)

**Supplementary Figure S1.** Restricted cubic spline curves showing the model-predicted probability of early childhood wheezing against *size* (A), *tempo* (B) and *velocity* (C) of growth. The solid lines represent the model-predicted probability of wheezing (log [OR]) for a standard deviation (SD) increase in size, tempo and velocity, adjusted for child's sex, gestational age, lower respiratory tract infections (bronchitis, bronchiolitis and pneumonia), maternal asthma, child's siblings, maternal pre-pregnancy BMI, maternal smoking during and after pregnancy and maternal nationality, age and education at delivery. Dashed lines represent 95% confidence intervals.

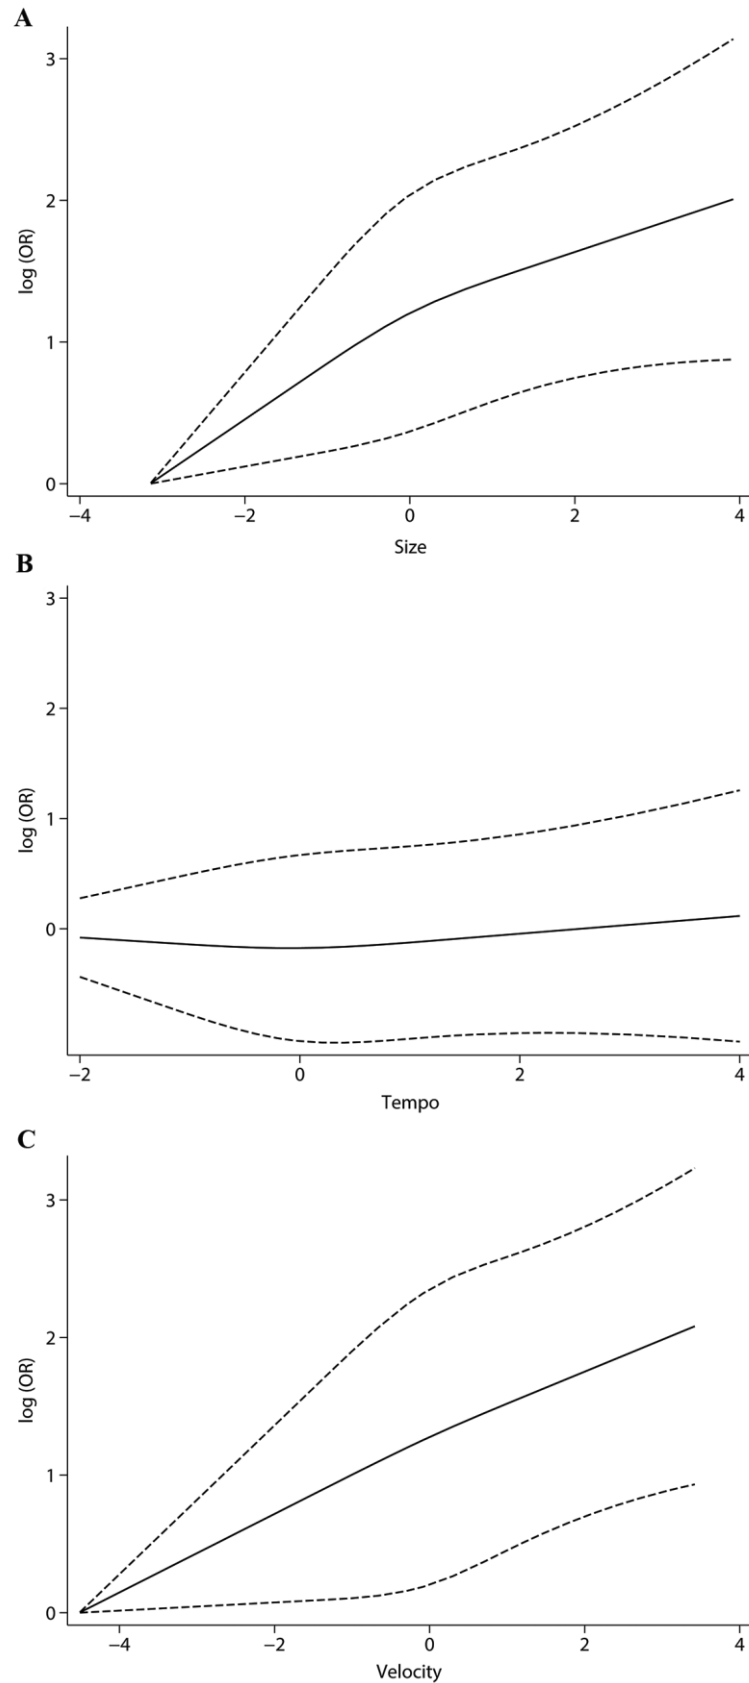

Supplement: inline-supplementary-material-2 [file inline-supplementary-material-2.pdf]
